# Supplementary material for: The conserved AU dinucleotide at the 5′ end of nascent U1 snRNA is optimized for the interaction with nuclear cap-binding-complex
Source: PubMed Central journal article supplement — Nucleic Acids Res. 2017 Jul 13;45(16):9679–93. doi: 10.1093/nar/gkx608 (PMC5766165; doi:10.1093/nar/gkx608), 2017-07-13
Supplement: gkx608_supp.pdf [file gkx608_supp.pdf]

|                        |                                         |                                        |
|------------------------|-----------------------------------------|----------------------------------------|
| <i>H. sapiens</i>      | AUACUUACCUGGCAGGGGAGAUCCA-UGAUCACGAAG   |                                        |
| <i>M. musculus</i>     | AUACUUACCUGGCAGGGGAGAUCCA-UGAUCACGAAG   |                                        |
| <i>D. melanogaster</i> | AUACUUACCUGGCUGAGAGGUUAACCGUGAUCACGAAG  |                                        |
| <i>S. cerevisiae</i>   | AUACUUACCU---UAAGAUUAUCAGAGGAGAUCAAGAAG |                                        |
| <i>S. pombe</i>        | --ACUUACCUGGCAUGAGUUUCUGCA--GCACAAGAAU  |                                        |
| Schizosaccharomyces    | <i>cryophilus</i>                       | UUACUUACCUGGCACGGGUUUUCGCA--GCUCAAGAAU |
|                        | <i>octosporus</i>                       | UUACUUACCUGGCACGGGUUUUCGCA--GCUCAAGAAU |
|                        | <i>japonicus</i>                        | UCACUUACCUGGCACGGGUCUUUGCA--GCUCAAGAAG |

**Supplementary Figure S1.** Sequences of the 5'-end dinucleotide of the U1 snRNAs in four *Schizosaccharomyces* species are distinct from the highly conserved AU dinucleotide. U1 snRNA sequence of *Schizosaccharomyces* species were downloaded from EnsemblFungi. Sp: SPSNRNA.01; Sc: EFSCRG00000000143; So: EFSOCG00000000255 and Sj: EFSJAG00000000237.

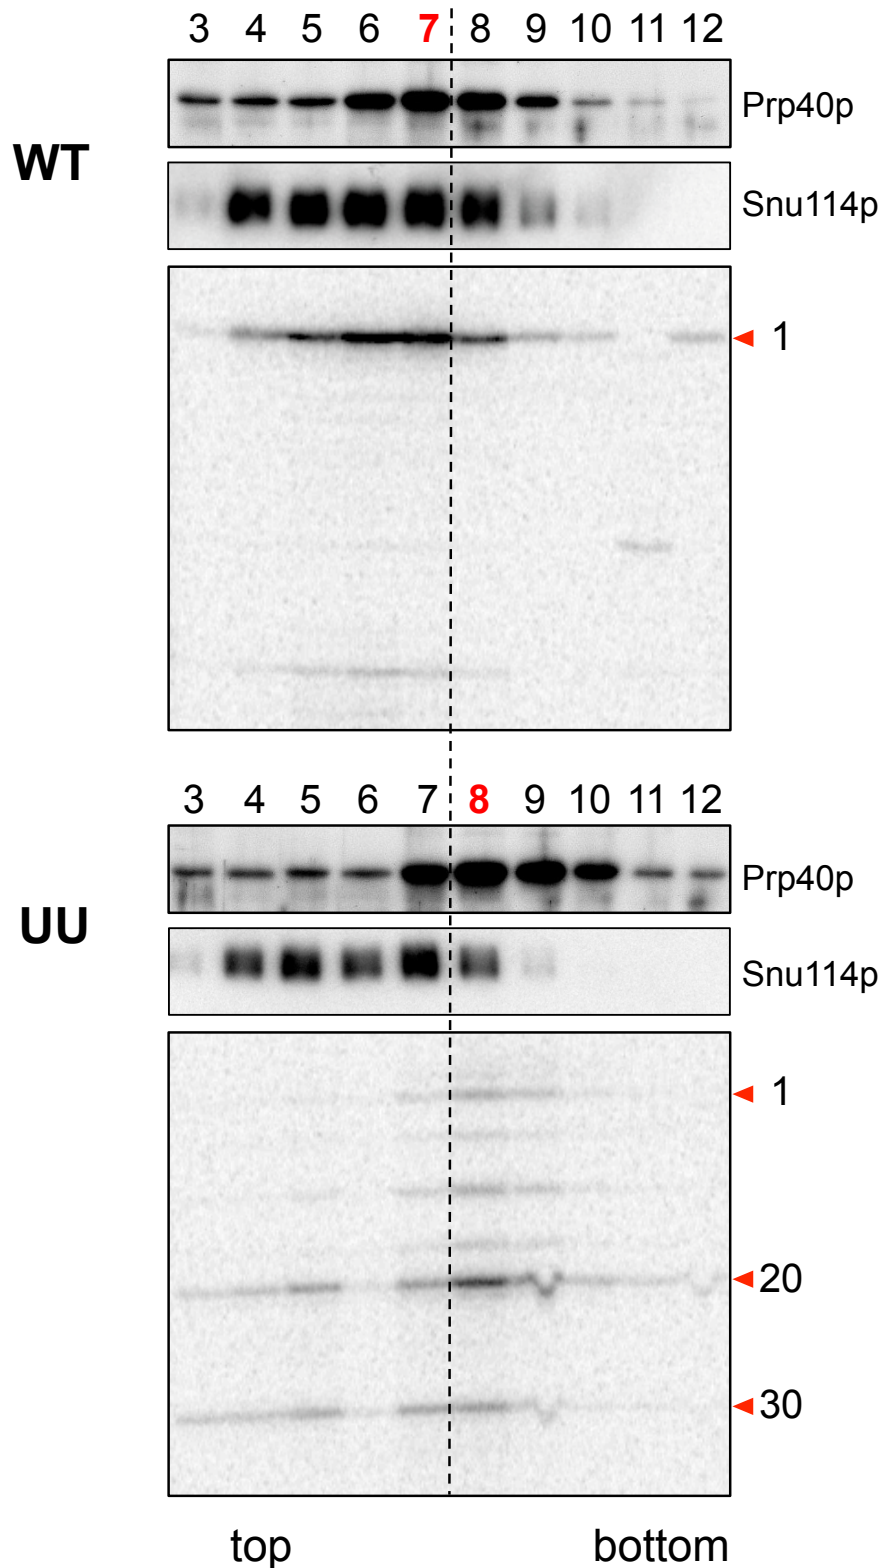

**Supplementary Figure S2.** Sucrose gradient analysis of the U1 snRNP in the wild-type (top) and the UU mutant strains (bottom). U1 snRNP, as detected by anti-Prp40p antibody, and U1 snRNA, as detected by primer extension co-peak at the fraction 7 in the wild-type strain (top). In contrast, U1 snRNP in the UU mutant is shifted to fraction 8 (bottom). Snu114p is a U5-snRNP specific component, thus serving as a proxy for U5 snRNP. Position of the 5'-end of U1 snRNAs are numbered.

**A**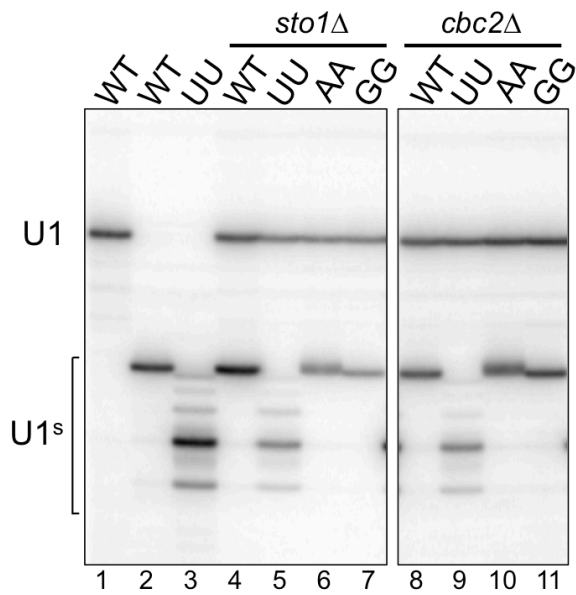**B**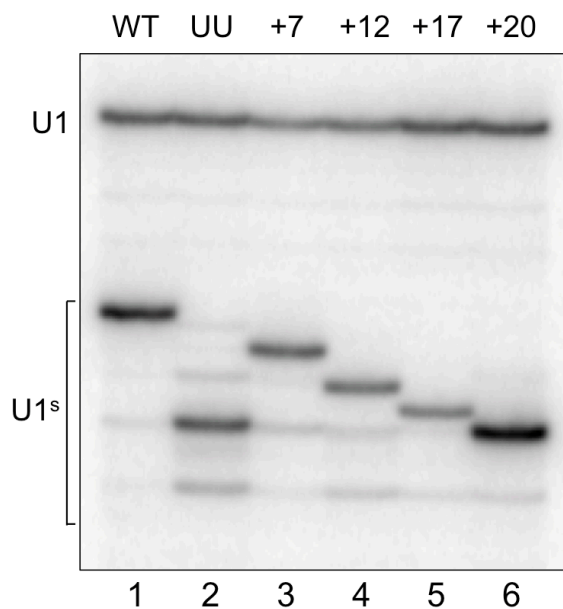**C**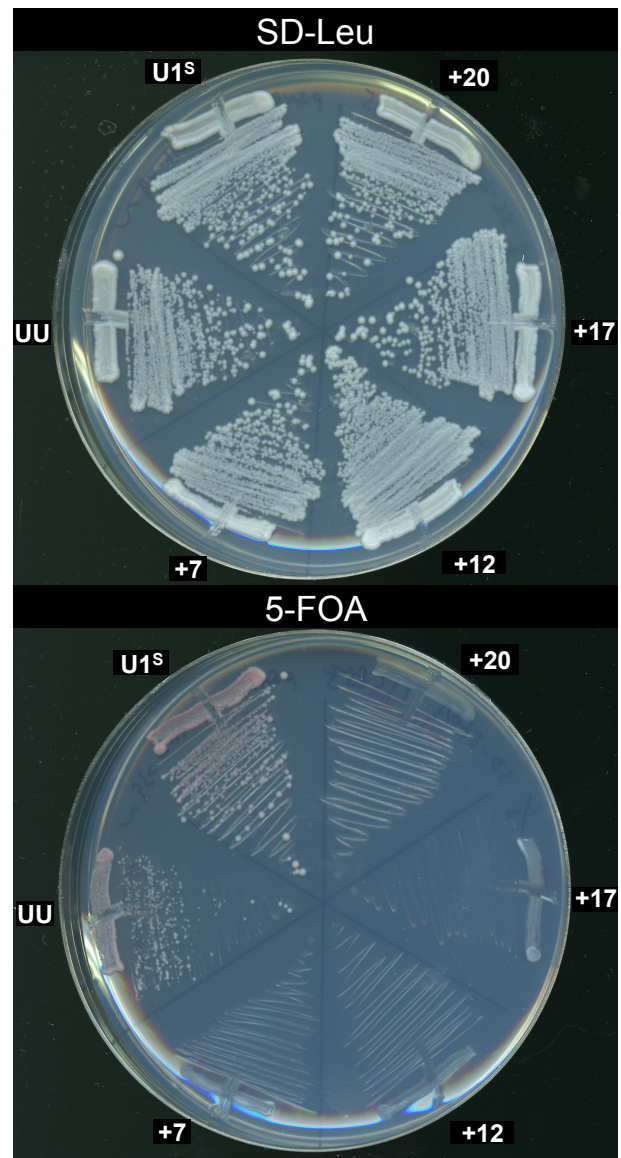

**Supplementary Figure S3.** 5'-end truncated U1 snRNA species produced in UU mutant are functionally defective. **(A)** The 5' ends of U1 snRNA species were mapped by primer extension in cells expressing either a full-length U1 snRNA (lane 1), a shortened form of U1 snRNA (U1<sup>s</sup>) (lanes 2-3), or both (lanes 4-11). The 5'-end mutations (UU, AA, and GG) were engineered in the context of U1<sup>s</sup>. The relevant chromosomal genetic backgrounds (*sto1Δ* and *cbc2Δ*) are indicated. Note that the UU mutant produced multiple species of shortened U1 snRNAs, with prominent starts from +20 and +30 (see also Figure 2). **(B)** Production of U1<sup>s</sup> snRNA species from +7 (lane 3), +12 (lane 4), +17 (lane 5), and +20 (lane 6) in the presence of full-length U1 snRNA. **(C)** The 5'-end shortened U1 snRNA species fail to complement *snr19Δ*. Cells co-expressing a full-length U1 snRNA and a specific form of U1<sup>s</sup> grew well on SD-Leu plate (top panel), but were inviable upon 5-FOA challenge, which counterselected the plasmid expressing the full-length U1 snRNA.

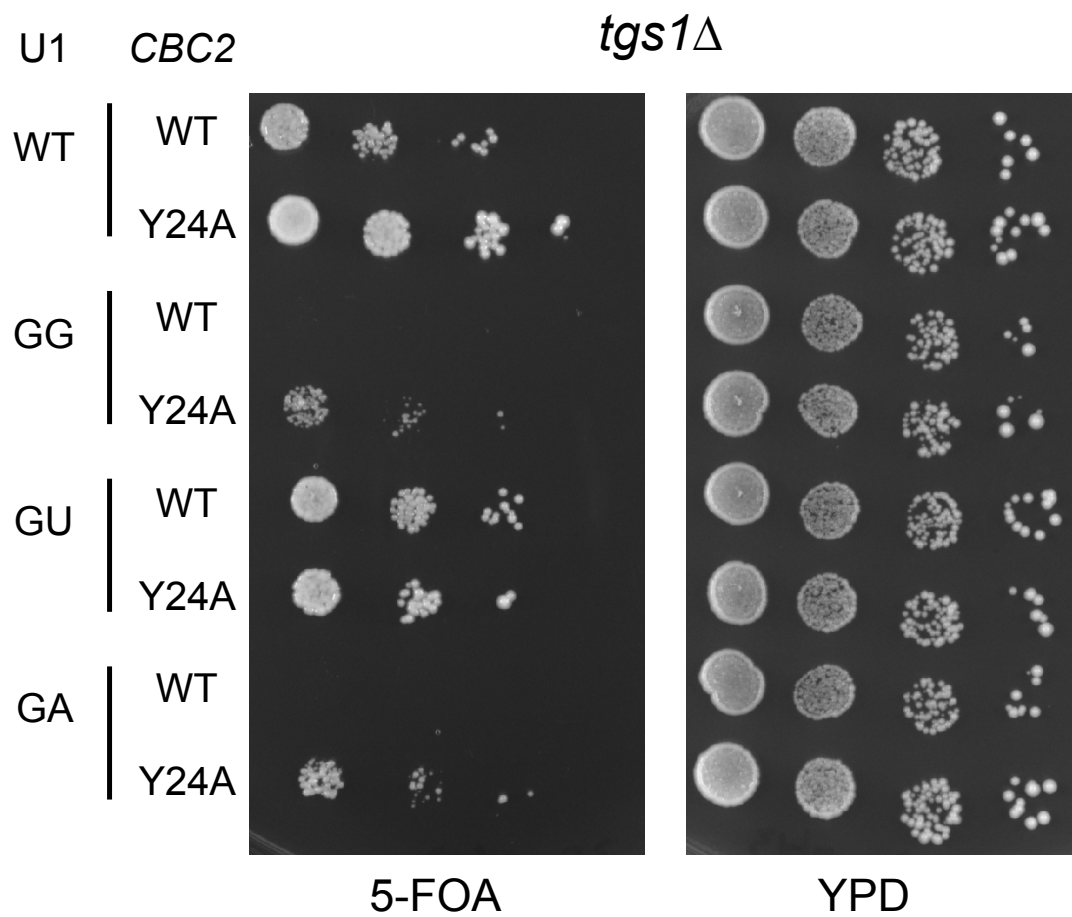

**Supplementary Figure S4.** Rescue of the *GG/tgs1*Δ and *GA/tgs1*Δ synthetic lethality by *CBC2*-Y24A mutation at 30°C. See also Figure 6A.

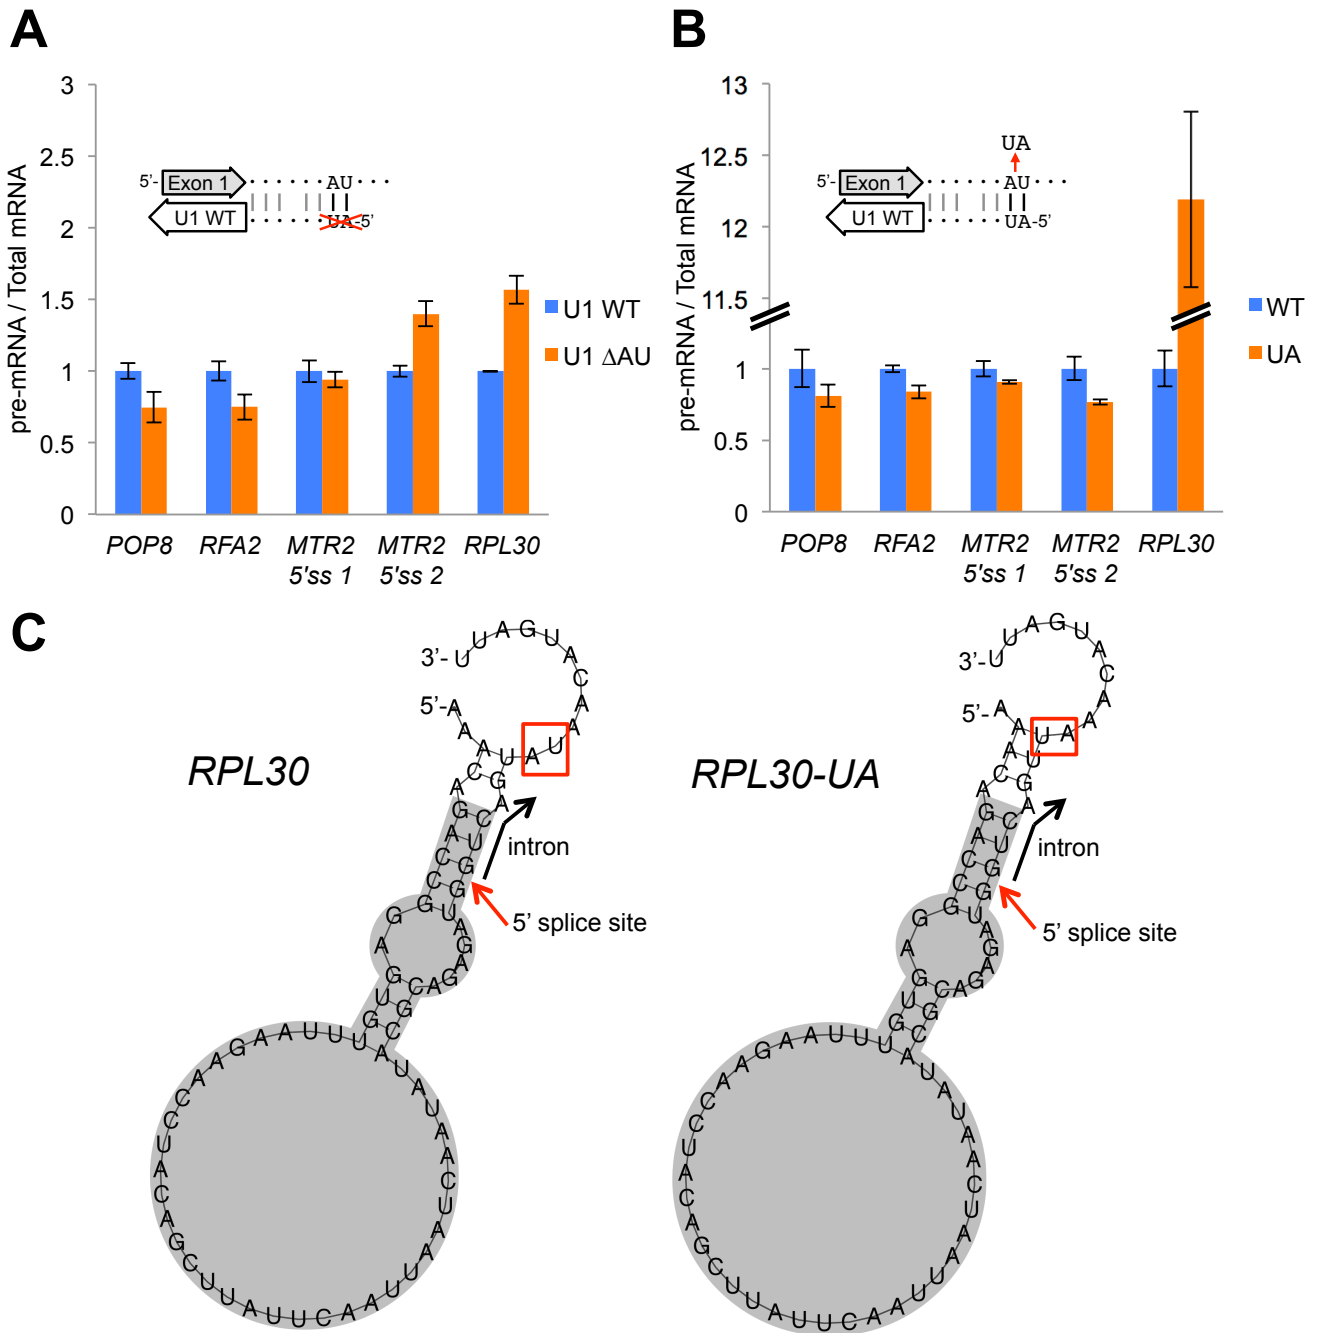

**Supplementary Figure S5.** Disrupting the hypothetical basepairing between the 5'-end AU dinucleotide of the U1 snRNA and intron position 7-8 does not affect splicing efficiency. **(A)** Deleting the 5'-end AU dinucleotide of the U1 snRNA did not significantly affect splicing of selected introns. **(B)** Altering intron positions 7-8 did not affect splicing except in *RPL30*. For each essential gene, we constructed two strains harboring either wild-type or mutated intron (UA) in the context of its chromosomal deletion. Data in **(A)** and **(B)** represent the mean  $\pm$  s.e.m. of three biological replicates. The significant accumulation of intron-containing *RPL30-UA* transcript may result from a hyper-stabilized secondary structure known to inhibit *RPL30* splicing (see below). **(C)** Predicted secondary structure of *RPL30* exon 1 and part of intron sequence. The *RPL30* RNA folds into a well-studied structure (gray-boxed) that blocks the 5'ss and inhibits its own splicing. Substitution of *RPL30* intron position 7-8 from AU to UA (red-boxed) is expected to further stabilize this structure by introducing one additional base pair (or three more, in comparison to the experimentally validated stem structure covered by the gray region). Structures were predicted by *RNAfold* WebServer (<http://rna.tbi.univie.ac.at/cgi-bin/RNAWebSuite/RNAfold.cgi>).

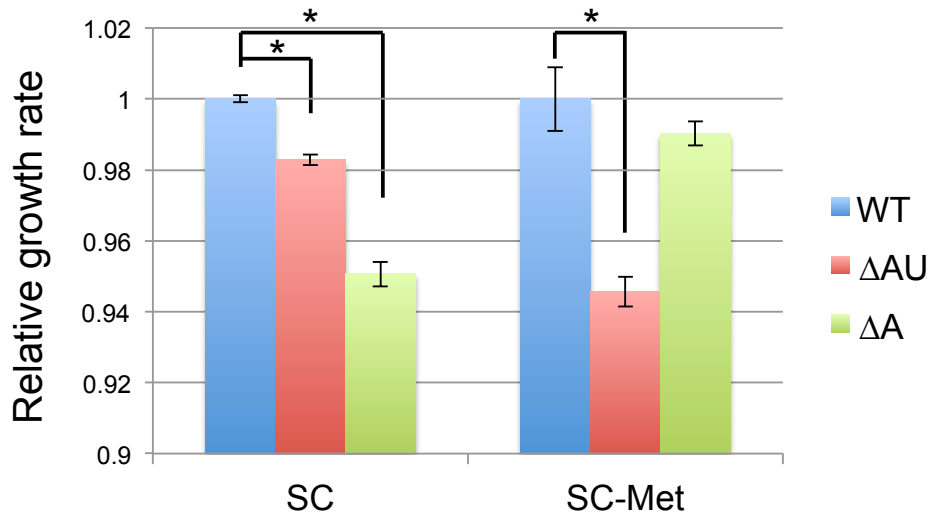

**Supplementary Figure S6.** Loss of the 5'-end AU dinucleotide of the U1 snRNA results in a significant reduction of cell fitness. Fitness was measured for the  $\Delta$ AU and the  $\Delta$ A mutants grown in synthetic complete medium (SC) and in SC medium dropping out of methionine (SC-Met), respectively. Note that both these two mutant strains produce a U1 snRNA transcript missing the 5'-end AU dinucleotide. Data represent the mean  $\pm$  s.e.m. of three biological replicates. \*:  $p < 0.01$ , two-tailed t-test.

**Supplementary Table S1: Oligonucleotides used in this study.**

| Gene          | Experiment                             | Sense oligonucleotide         | Antisense oligonucleotide         | Note                                                               |
|---------------|----------------------------------------|-------------------------------|-----------------------------------|--------------------------------------------------------------------|
| <i>SNR19</i>  | Primer extension                       |                               | GGTGTCAAACCTCTCCAGGC              | Position 266-285                                                   |
|               | Northern blotting                      | GATCAAGAAGTCTACTGATCAAACATGCG | CACCCGTTCTACCAAGACCTTCC           | For PCR DIG probe, position 26-543                                 |
|               | Quantitation of TMG-capped snRNA       | CGGCAGATTCGAATGAACTTAA        | ACAATCCCACCAATAATCTCA             | Position 388-455                                                   |
| <i>SNR20</i>  | Primer extension                       |                               | AAAGTAGTGAGACCTGACATTAGCGG        | Position 172-197                                                   |
|               | CC formation                           |                               | CAGATACTACACTTG                   | RB60, position 29-43                                               |
|               | Quantitation of TMG-capped snRNA       | GCCGGCGGCATCAA                | GGGTCGCGACGTCTCTAACT              | Position 1037-1103                                                 |
| <i>ACT1</i>   | ChIP primer set 1                      | CCAAGAAGAAAAAGAAAGGTCAATC     | AAAGCAGTAAGCGTGAAAAATCTAAA        | Position (-122)-(-36)                                              |
|               | ChIP primer set 2                      | TCTTCCAAGATCGAAAATTTACTG      | GGACCGTGCAATTCTTCTTACAG           | Position (-33)-64                                                  |
|               | ChIP primer set 3, Splicing efficiency | GATTGCTTCATTCTTTTGTGCTAT      | CTTTACACATACCAGAACCGTTATCAA       | Position 280-363, also used for splicing efficiency assay (intron) |
|               | ChIP primer set 4, Splicing efficiency | CTCGTGCTGTCTTCCCATCTATC       | TTGACCCATACCGACCATGA              | Position 388-455, also used for splicing efficiency assay (exon 2) |
|               | ChIP primer set 5                      | CCGTGACATCAAGGAAAACTATG       | CAGCGTTTTGCATTCTTGT               | Position 935-999                                                   |
|               | ChIP primer set 6                      | TCCCAGGTATTGCCGAAAAGA         | TCATGGAAGATGGAGCCAAAG             | Position 1225-1284                                                 |
| <i>RPS9B</i>  | Splicing efficiency                    | TTTTCCAAGGCGGATACCTAATT       | GGCCCAAGTAAGTGCTCATAAATATT        | Intron region, 281-353                                             |
|               | Splicing efficiency                    | AAACGCTGCTAGAAAGGCTGAA        | TTTATTCTTCGTCTTCGGCTTCTT          | Exon 2, 938-1002                                                   |
| <i>RPS10A</i> | Splicing efficiency                    | GACAGCACAAAGGCCATCGA          | TGCCCAAATATAGGACGTATACCA          | Intron region, 272-334                                             |
|               | Splicing efficiency                    | TTCAAGAAAGAAACCCAACTCAAA      | AGAGAAAATTC AATTGGAGCTACGAAT      | Exon 2, 712-785                                                    |
| <i>RPS10B</i> | Splicing efficiency                    | AGTACGGCAGTGCATGAATCC         | GACGCGTGAATAATGGAATTCT            | Intron region, 199-264                                             |
|               | Splicing efficiency                    | TTCAAGAAAGAAACCCATCCCAA       | ATAGAAAATAGTTTACTTAAACGTAACAACGC  | Exon 2, 685-762                                                    |
| <i>RPS11A</i> | Splicing efficiency                    | CGACTAATAGAATTTGCCAGTCAAA     | ACCCAATCAACTATCGTAAACGTAAT        | Intron region, 190-321                                             |
|               | Splicing efficiency                    | GATTCAACGTTGTCAAGGTCTCTGCT    | CGTAAGTCTTATGCTGATT CATAACCAGCT   | Exon 2, 746-839                                                    |
| <i>RPS11B</i> | Splicing efficiency                    | CCAAGTAAGGAGGATCTCCATCA       | TTAGGCGAAAAGGAAATCGTTAA           | Intron region, 408-485                                             |
|               | Splicing efficiency                    | GATTCAACGTCGTCAAGGTCTCT       | CCTACGTTTTATCCTCCACTTATTATTATATCA | Exon 2, 918-1034                                                   |
| <i>RPL16A</i> | Splicing efficiency                    | GCCGCAGGATTTGCTCATAG          | CTATCTCCATGTTTTAGCGTATACACAA      | Intron region, 78-208                                              |
|               | Splicing efficiency                    | CAAATTGGAAGCAAAGAGAAAGGTTTC   | GCAGTAGCATTAGCAGAGGCAACTTTC       | Exon 2, 752-844                                                    |
| <i>MUD1</i>   | Splicing efficiency                    | CGTTTCCTAAATCTTCTTTCTACTA     | CTGGCCTACTGGGTAAATTTT             | Intron region, 32-129                                              |
|               | Splicing efficiency                    | AAATTTGCCAAGCGGCACTA          | CAACTAAAGCCTCATTGCCAAGT           | Exon 2, 785-849                                                    |
| <i>SAE3</i>   | Splicing efficiency                    | TGAATGGCAACCTGATAAAGATGT      | GCCGACTGGAAAAAATAGCTACA           | Intron region, 62-139                                              |
|               | Splicing efficiency                    | ATTGAGAGATGCCGGTTAAGG         | CTTAATTTTGCATTGCTTTTCATCAG        | Exon 2, 260-323                                                    |

(Continued on next page)

**Supplementary Table S1 (continued):** Oligonucleotides used in this study.

| Gene         | Experiment          | Sense oligonucleotide         | Antisense oligonucleotide     | Note                                           |
|--------------|---------------------|-------------------------------|-------------------------------|------------------------------------------------|
| <i>POP8</i>  | Splicing efficiency | GGGGAAAAGACTTTTAGAGAATGG      | GTTTATTTCTCTTCGGTAGTTGAGACTCA | Intron region, 3-97                            |
|              | Splicing efficiency | CATTCGATCAAGATGTGGACGAT       | TTATTTAACCATTCGCTCCATGTC      | Exon 2, 128-194                                |
| <i>RFA2</i>  | Splicing efficiency | GTATGTATTAGTGCTAGGAATTGGAGGAT | GAATCCCATCCATTGTTAGTAATTTAAC  | Intron region, 8-107                           |
|              | Splicing efficiency | TGTGAGGGCAAAGACGCTAA          | AGGATTGCGAGATCAATGGAA         | Exon 2, 772-829                                |
| <i>MTR2</i>  | Splicing efficiency | TGATAGACCATGACTCCCTGTATGTAT   | GACACGTTCAACTTTTCTTGTTAGT     | Wild-type 5'ss 1, Intron region, (-236)-(-167) |
|              | Splicing efficiency | TGATAGACCATGACTCCCTGTATGTTA   | GACACGTTCAACTTTTCTTGTTAGT     | 5'ss 1 UA mutant, Intron region, (-236)-(-167) |
|              | Splicing efficiency | AGAAAAGTTGAACGTGTCGTACGTAT    | CGTTTGCGCATCCTCTTTTTTA        | Wild-type 5'ss 2, Intron region, (-185)-(-99)  |
|              | Splicing efficiency | AGAAAAGTTGAACGTGTCGTACGTTA    | CGTTTGCGCATCCTCTTTTTTA        | 5'ss 2 UA mutant, Intron region, (-185)-(-99)  |
|              | Splicing efficiency | GCAACGTCAATTGCAAAGTCA         | CGTCTTGCCCCATCTTGTCT          | Exon 2, 287-346                                |
| <i>RPL30</i> | Splicing efficiency | TCCTGCTCTTGTGTTGAGAGAGT       | GCATATCTCACTTTTATTTACAGTCATG  | Intron region, 98-170                          |
|              | Splicing efficiency | ACTTCCAAGGTGGTAACAACGAA       | AAATAGAGACAACACCGACTCTGAATAA  | Exon 2, 436-507                                |



**Supplementary Table S2:** Hypothetical basepairing of U1 5'-end variants and the intron positions 7-8.

| Position 7-8 of introns | No. of pertinent 5'ss | Introns in essential genes | Base pairing with U1 5'-end variants <sup>a</sup> | Essential genes                                                                                              |
|-------------------------|-----------------------|----------------------------|---------------------------------------------------|--------------------------------------------------------------------------------------------------------------|
| AU                      | 45 (14.3%)            | 15 (23.8%)                 |                                                   | <i>ARP9, GPI15, MTR2<sup>b</sup>, POP8, PRE3, RFA2, RPL30, TAD3<sup>c</sup>, YML6</i>                        |
| UA                      | 56                    | 14                         |                                                   | <i>COF1, DBP2, ERD2, GLC7, NCB2, NOG2, RPL33A, RPL42A, RPS26A, SAR1, SEC27, YOS1<sup>c</sup>, YRA1, YSF3</i> |
| UC                      | 22                    | 8                          |                                                   | <i>ACT1, EFB1, GCR1, LSM2, MOB2, RPL18A, TFC3, TUB1</i>                                                      |
| UU                      | 44                    | 5                          |                                                   | <i>BOS1, KEI1, NSP1, RPS13, SMD2</i>                                                                         |
| UG                      | 15                    | 4                          |                                                   | <i>ARP2, ERV1, MOB1, SEC14</i>                                                                               |
| GA                      | 15                    | 4                          |                                                   | <i>BET1, PFY1, RPL25, RPL32</i>                                                                              |
| AG                      | 12                    | 4                          |                                                   | <i>BIG1, RPL28, SEC17, UBC9</i>                                                                              |
| AA                      | 33                    | 3                          |                                                   | <i>PRP5, SFT1, YOS1<sup>c</sup></i>                                                                          |
| GC                      | 10                    | 2                          |                                                   | <i>BET4, PMI40</i>                                                                                           |
| CU                      | 8                     | 2                          |                                                   | <i>ECM9, SPT14</i>                                                                                           |
| GG                      | 8                     | 1                          |                                                   | <i>KIN28</i>                                                                                                 |
| CA                      | 8                     | 1                          |                                                   | <i>RPL17A</i>                                                                                                |
| AC                      | 20                    | 0                          |                                                   |                                                                                                              |
| GU                      | 12                    | 0                          |                                                   |                                                                                                              |
| CG                      | 4                     | 0                          |                                                   |                                                                                                              |
| CC                      | 2                     | 0                          |                                                   |                                                                                                              |
| Total                   | 314                   | 63                         |                                                   |                                                                                                              |

- a. Basepairing between intron positions 7-8 and the "observed" 5'-end sequence of U1 snRNA (**Fig. 2**).  
 b. *MTR2* contains six 5' UTR introns from permutations of two 5' ss and three 3' ss.  
 c. Contains two introns.

**Supplementary Table S3:** Biding free energy of CBC and the cap analogue m<sup>7</sup>GpppX

| CBC20 | m <sup>7</sup> GpppX | $\Delta G^\circ$ (kcal/mol) |          | $\Delta\Delta G^\circ$ |
|-------|----------------------|-----------------------------|----------|------------------------|
|       |                      | Exp. Data                   | Modeling |                        |
| WT    | G                    | -11.3 ± 0.1                 | -14.4    |                        |
| Y138A | G                    | -10.5 ± 0.1                 | -13.4    | 0.8 / 1.0              |
| WT    | A                    | N.A.                        | -14.3    | 0.1                    |
|       | C                    | N.A.                        | -13.7    | 0.7                    |
|       | U                    | N.A.                        | -13.7    | 0.7                    |

Exp. Data is adapted from Worch *et al.* (2009).

$\Delta\Delta G^\circ$  is the difference of  $\Delta G^\circ$  in comparing to that of WT vs. m<sup>7</sup>pppG.
